# Supplementary material for: The sea lamprey Petromyzon marinus genome reveals the early origin of several chemosensory receptor families in the vertebrate lineage
Source: PubMed Central journal article supplement (PMC2728731; doi:10.1186/1471-2148-9-180), 2009-07-31

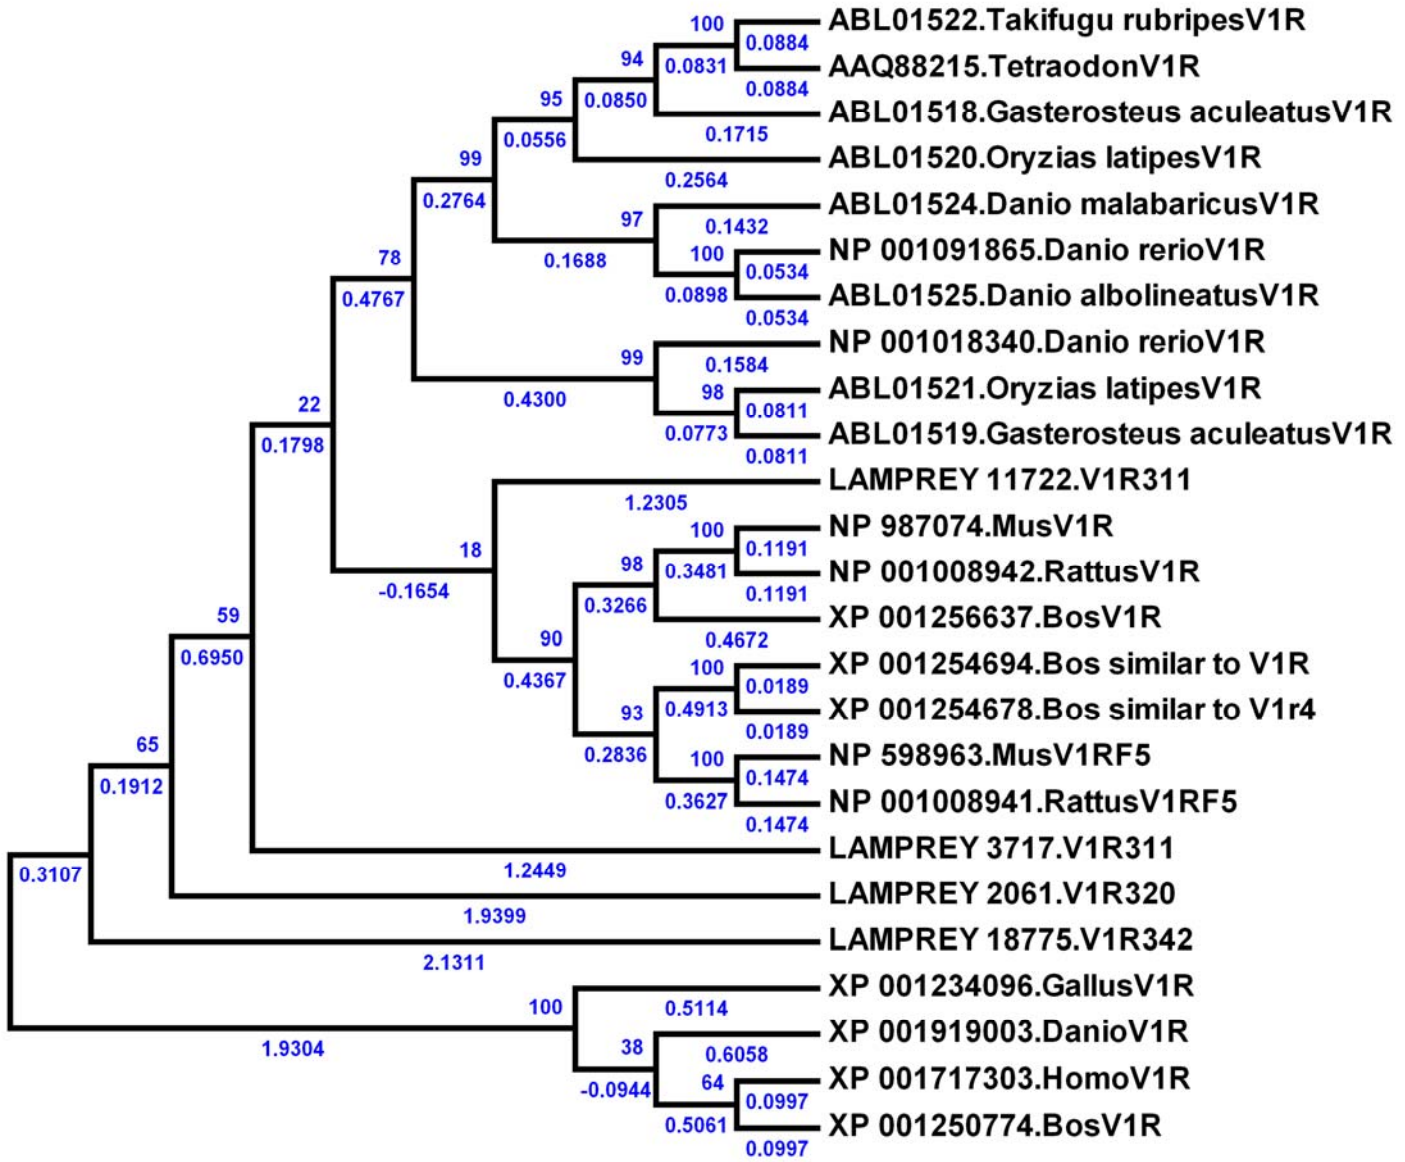

Supplement: 1471-2148-9-180-S3.pdf [file 1471-2148-9-180-S3.pdf]
