# Supplementary material for: The sea lamprey Petromyzon marinus genome reveals the early origin of several chemosensory receptor families in the vertebrate lineage
Source: PubMed Central journal article supplement (PMC2728731; doi:10.1186/1471-2148-9-180), 2009-07-31
Supplement: 1471-2148-9-180-S4.pdf [file 1471-2148-9-180-S4.pdf]

**Lamprey V1R aligned to V1r pheromone receptor-like AAX10116 [Danio malabaricus]**

Score = 75.5 bits (184), Expect = 6e-12, Method: Compositional matrix adjust.  
 Identities = 70/280 (25%), Positives = 135/280 (48%), Gaps = 24/280 (8%)

Query 17 GTIGNTCVLTVFLHIAVKNGLLPSDRSVINMSIVHLLASVFNKILYVDFDFKMH-LLNN 75  
 G + NT VL + HI + + +L P D + + + L + + + F M LL++

Sbjct 1 GILTNLTVLLAYTHIRLTDSQLQPVDAILCHLAFADLMLLLTRCVPQMTVF GMRNLLDD 60

Query 76 IGCRLLYSINLFRTLSISFTLLLSLQFNKLQNSTYPGINVISLKFESICLVSVLLWI 135  
 GC+++Y+ + RTLS+ T +LS+FQ + P + + + + + V LW

Sbjct 61 AGCKVVIYTYRIARTLSVCITCMLS VFQAVTVAPEAGPQLSRLKARLPQLVPTPTFVALWF 120

Query 136 ISSAIFTPLFFDDILTLNNSGLLQFSSCSISPSGGYHLYFGIGTIILVDGFG----- 189  
 I+ A+ FF ++ +G + + + G H+ F +++G

Sbjct 121 INMAVCIAAPFF----SVAPRNGTVPFPFTLNL---GFCHVDFRDNLSYVINGVAVSVRDF 173

Query 190 AF--AIVTMNVLILKILWKHHMVAARGWVHNANHMATLNAVKIVACLITITYIICWSINI 247  
 AF A++ + IL +L +H V RG + A + V L++ Y + + I +

Sbjct 174 AFVGMALGSSGYILVLLHRHGRRV--RGIRRSQGSTMETRAARTVEMLVVLYAVFFGIDN 231

Query 248 IIRILLMRFGASLSAIP--MADIASVFSSLYSFSFPFIII 285  
 +I I ++ ++ +P +AD+ FSS Y S SPF+II

Sbjct 232 VIWIYML----TVPQVPPVADMRVVFSSCYASVSPFLII 267

|                                                  |              |         |    |
|--------------------------------------------------|--------------|---------|----|
| ^conserved in Mus V1Rs (Pfister and Rodriguez)   | AAX10116     | G-ILTN- | 5  |
| conserved in fishes                              | 3717.V1R311  | G-TIGN- | 21 |
| N-linked glycosylation site                      | 11722.V1R311 | G-VVFN- | 23 |
| Not conserved in ORs (Saraiva and Korsching)     | 18775.V1R342 | G-FVGN- | 48 |
| Conserved in ORs (Niimura and Nei)               | 2061.V1R320  | NLFMTAP | 39 |
| In fish V1R but not mammal V1R (Niimura and Nei) | .            | :       | :  |

gi|59891918|gb|AAX10116.1| -----TLVLLAYTHIRLTDSQLQPVDAILCHLAFADLMLLLTRCVPQTM 49  
 3717.V1R311 -----TCVLTVFLHIAVKNGLLPSDRSVINMSIVHLLASVFNKILYVDF 65  
 stig\_11722.V1R311 -----ALILGVIANACAYECLPPSDAILVNLAFVNLISLVRNGPLLF 67  
 stig\_18775.V1R342 -----SLVI-IITGFKIKKS--TPT-ILIMNLAIADFILITLPLWIVH 88  
 stig\_2061.V1R320 SLCLFLSITVITFTEVKLREN---SRYILFASLLACDTFFLLCSTIMSTF 86

gi|59891918|gb|AAX10116.1| TVFGMRNLLDAGCKVVIYTYRIARTLSVCITCMLS VFQAVTVAPEAGPQ 99  
 3717.V1R311 DFFKM-HLLNNGICRLLLYSINLFRTLSISFTLLLSLQFNKLQNSTYPG 114  
 stig\_11722.V1R311 WDAGVRMSLSVGC LCMGVWVVTESVSVVTTLTSMFHLYLMVS-RRHTS 116  
 stig\_18775.V1R342 YALDYHWPYGHLMCKIMPFI SYVNVNTASIFYVTTLSLDRFLLAV--QHPW 136  
 stig\_2061.V1R320 IWLQTNLSLTS--CSVNTMVSTILNQSGVLCVTLMSVERYVAIC---HP- 130

gi|59891918|gb|AAX10116.1| LSRLKARLPQLVPTTFVA-LWFINMAVCIAA--PFFS-VAPRNGTVPFPFT 145  
 3717.V1R311 INVISLKFESICLVSVL-LWISSAIFTPL--LFFDDILTLNNSG--L 159  
 stig\_11722.V1R311 VKGKTSALRN-AALTLLC-VWAANVLFSLPA--VVFSGN SAGNFERLML 162  
 stig\_18775.V1R342 VPKIRT-MNN-TILVCFG-VLFLASLSIPT--FVFSKAL EHNQGVYCYQ 181  
 stig\_2061.V1R320 FHHPRC-FSHRKTFLAIIVSVASVFPLACGILVFTSGVTVNNIRT--- 176

gi|59891918|gb|AAX10116.1| LN-----LGFCHVDFRD---NLSYVINGVAVSVRDF-AFVGMALGSSGY 185  
 3717.V1R311 LQ-----FSSCSISPSGG-YHLYFGI-GTIILVDGFGAF--AIVTMNVL 199  
 stig\_11722.V1R311 VSGTVRPLLG-CVLHFA SAREGLAYTT--ASMIINEIVP-IV-LMVTVNIK 208  
 stig\_18775.V1R342 DND---LVDHAAIILAN--FVINFLI---PITIMSF-CYLYIVLKMRSRV 221  
 stig\_2061.V1R320 -----CSTYLT-----SLMP--NPMAITVLRSP-NVIIFSV 207

gi|59891918|gb|AAX10116.1| ILVLLHRHGRRV--RGIRRSQGSTMET-RAARTVEMLVVLYAV--FFGID 230  
 3717.V1R311 ILKIWKHHMVAARGWVHN-ANHMATLNAVIVACLITITYII--CWSIN 246  
 stig\_11722.V1R311 TLLIHRHRRLQHVASLMP-SRVSTV-KAKVIMVVTIIVVI--CWGIH 254  
 stig\_18775.V1R342 SYSANRRAINLIIAIVVVFCLCWLPHY-FLVDIVEGLSILHDVNKYWHVS 269  
 stig\_2061.V1R320 IIALIFTYFNIMMAARKASDDASKAKR-AKQTVILHGLQLLY--LCSLG 254

gi|59891918|gb|AAX10116.1| N----VIWIYMLTV--PQVPPV--VADMRVVFSSCYASVSPFLII---- 267  
 3717.V1R311 I----IIRILL-MRFG-ASLSAIP-MADIASVFSSLYSFSFPFIIIFGRS 289  
 stig\_11722.V1R311 -----VFAINY-YNY--RQDDLEWLISLARFSTAINISMGLILLVVCHG 296  
 stig\_18775.V1R342 HETNKAKRILISLAFSHSCLNPIL-YAFLAKGFRTOFKS--AFILQYFEH 316  
 stig\_2061.V1R320 N---RFFEILFAIIT--TDRNMIT-ILRLCN-YLCLYYS-SRFVVPLIYG 296
