# Supplementary material for: The sea lamprey Petromyzon marinus genome reveals the early origin of several chemosensory receptor families in the vertebrate lineage
Source: PubMed Central journal article supplement (PMC2728731; doi:10.1186/1471-2148-9-180), 2009-07-31
Supplement: 1471-2148-9-180-S6.pdf [file 1471-2148-9-180-S6.pdf]

## IN SILICO

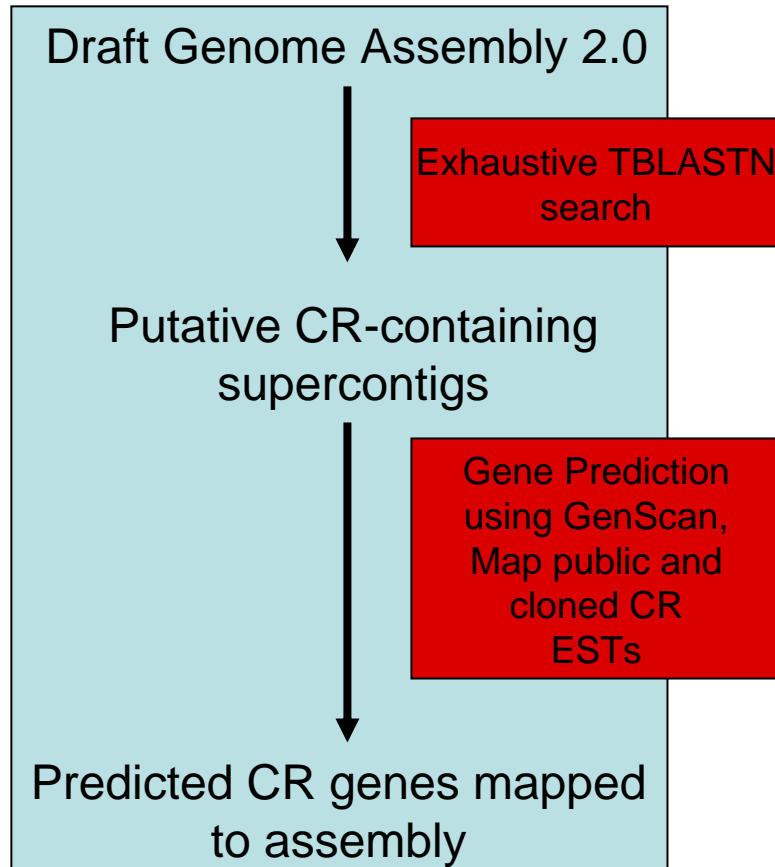

## IN VIVO

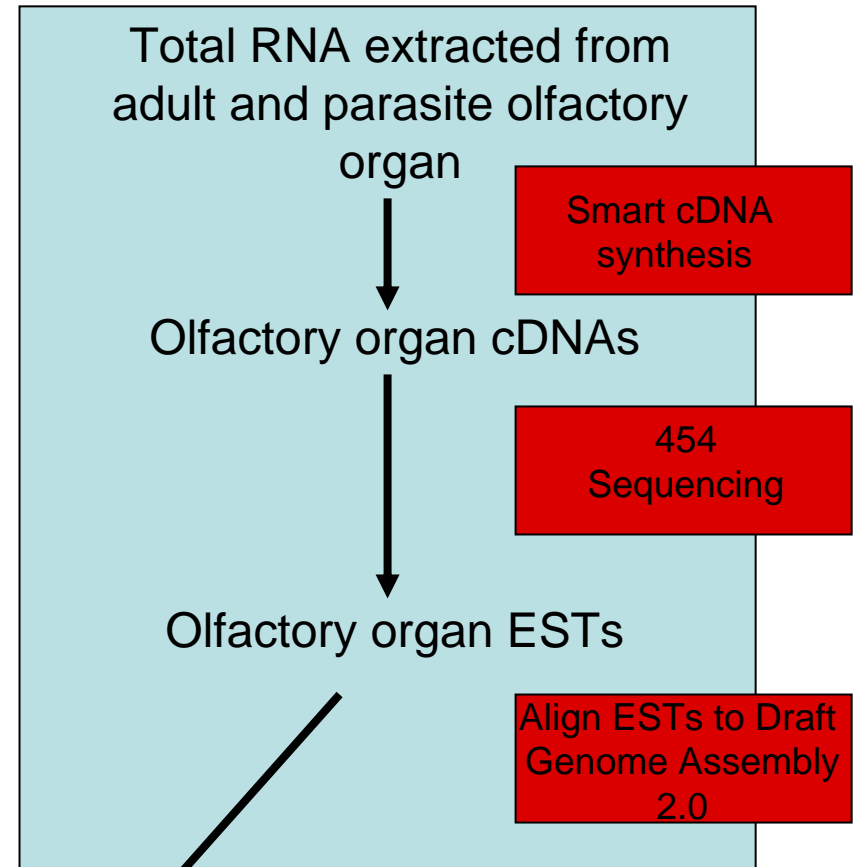

Predicted CR genes expressed in sea lamprey olfactory organ
